# Supplementary material for: Single-Cell RNA Sequencing of Donor-Reactive T Cells Reveals Role of Apoptosis in Donor-Specific Hyporesponsiveness of Kidney Transplant Recipients
Source: Int J Mol Sci. 2023 Sep 23;24(19):14463. doi: 10.3390/ijms241914463 (PMC10572284; doi:10.3390/ijms241914463)
Supplement: Supplementary file 1 [file ijms-24-14463-s001.zip › 230812_vanderList et al_SupplementaryTables.xlsx]

## Sheet: Table S1
Table S1: Stable kidney transplant recipient characteristics
Number of individuals, #	7
Age in years, † *	68 (59-71)
Male, # (%)	3 (43%)
Time after transplantation in years, †	3.7 (3-4)
Donor age in years, † *	66 (53-74)
Donor Male, # (%)	5 (71%)
First kidney transplant, # (%)	7 (100%)
Transplantation from living donor, # (%)	7 (100%)
Number of mismatches HLA, † *
HLA class I	4 (2-4)
HLA class II	1 (1-2)
Renal replacement therapy, # (%)
No (pre-emptive)	5 (71%)
Hemodialysis	2 (29%)
Peritoneal dialysis	0 (0%)
Underlying kidney disease, # (%)
Nephrosclerosis/arteriosclerosis/hypertension	1 (14%)
Primary glomerulopathy	1 (14%)
Diabetic nephropathy	2 (29%)
Polycystic kidney disease	1 (14%)
Other	2 (29%)
Immunosuppressive regimen at post KT timepoint, # (%)
Tacrolimus and MMF	4 (57%)
Tacrolimus monotherapy	2 (29%)
Everolimus monotherapy	1 (14%)
† mean (range)
* At time of transplantation

## Sheet: Table S2
Table S2: Antibody panel for donor-reactive T cell sorting
Target	Fluorochrome	Company	clone	Catalog number	Titer(µl) *	RRID
FVS780		BD	N/A	565388	**	N/A
CD14	APC-H7	BD	MjP9	560180	0.125	AB_1645464
CD19	APC-H7	BD	Sj25C1	560177	0.5	AB_1645470
CD56	APC-Cy7	Biolegend	HCD56	318332	0.5	AB_10896424
CD137	APC	BD	4B4-11	550890	5	AB_398477
CD3	BV510	BD	HIT3a	564713	2	AB_2738909
* µL MoAb/50 µL cell suspension volume (max 10 million cells)
** 0.25µL/ml suspension of max 10 million cells

## Sheet: Table S3
Table S3: Cell numbers and reads from TCR and transcriptome sequencing
	Samples						Sort & Dispense				TCR															Transcriptome
			Donor-stimulated		Third party-stimulated		Sorting CD137+		Delivered for dispension		TRA					TRB					TRD					Before filtering				After QC filtering
chip I19-1175	Patient	Sample code	Pre	Post	Pre	Post	CD137+ T cells sorted	CD3+CD137+ enrichment (%)	Concentration (cells/mL) (x10^4)	Volume (uL)	Cells with TRA data (#)	Reads	Average reads/cell	Minimum reads per cell	Maximum reads per cell	Cells with TRB data (#)	Reads	Average reads/cell	Minimum reads per cell	Maximum reads per cell	Cells with TRD data (#)	Reads	Average reads/cell	Minimum reads per cell	Maximum reads per cell	Transcriptome clusters	Mapped clusters	Mapped clusters (%)	Cells with transcriptome data (#)	Cells with transcriptome data (#)	Reads	Average reads/cell	Minimum reads per cell	Maximum reads per cell
	P5A	P5A_predon	1				17411	0.8913	5.12088	340	127	2373211	18686.7	47	114206	135	619985	4592.48	27	27691	1	1022	1022	1022	1022	12323946	11392978	0.9245	260	186	18583766	71476	3307	311683
	P5B	P5B_predon	1				8472	0.9444	2.49206	340	217	3889271	17922.9	36	166926	239	1255355	5252.53	26	63485	9	191351	21261.2	57	68198	18099649	16742641	0.925	315	264	29267325	92912.1	3622	358982
	P5C	P5C_postdon		1			5806	0.8462	2.00207	290	75	1436741	19156.5	31	80463	84	398184	4740.29	39	25179	1	58	58	58	58	7523690	6937016	0.922	238	87	6990631	29372.4	5132	227730
	P5D	P5D_postdon		1			2600	0.7143	2	130	35	839430	23983.7	36	112137	40	181075	4526.88	252	19827	0	0	0	0	0	4097832	3774090	0.921	116	44	4238866	36541.9	11228	277844
chip I19-1361
	P1	C1-P1_predon	1				11330	0.867	3.23714	350	163	708253	4345.11	28	45325	166	585525	3527.26	26	76161	4	5732	1433	237	2929	6420207	5820650	0.907	260	177	6828169	26262.2	3369	264089
	P1	C1-P1_postdon		1			2509	0.846	2.0072	125	127	1451837	11431.8	27	234596	141	1490607	10571.7	27	143664	2	491	245.5	112	379	7473538	6985570	0.935	178	134	8622287	48439.8	4535	354022
	P1	C1-P1_postthirdP				1	13135	0.757	3.75286	350	179	1227915	6859.86	28	187007	178	1071341	6018.77	30	148691	2	20329	10164.5	995	19334	8872876	8251632	0.93	241	192	10623929	44082.7	4052	263715
chip I21-1110
	P0	C0-P0_predon	1				14519	1	4.1	350	160	287643	1797.77	27	18140	154	92187	598.617	26	8401	0	0	0	0	0	15237821	14324976	0.940093	217	156	15674332	72231.9	2894	406893
	P0	C0-P0_postdon		1			12035	0.89	3.44	350	124	152058	1226.27	28	14737	122	62940	515.902	26	7507	0	0	0	0	0	12232706	11286574	0.922656	209	130	11154309	53369.9	7369	330772
	P0	C0-P0_prethirdP			1		6178	0.78	2.06	300	112	222932	1990.46	28	26760	117	46065	393.718	26	3644	0	0	0	0	0	10249951	9400323	0.917109	184	98	8943961	48608.5	9801	405387
	P0	C0-P0_postthirdP				1	12189	0.96	3.5	350	93	319577	3436.31	30	22579	69	39639	574.478	29	2948	0	0	0	0	0	7377143	6870456	0.931317	168	47	4025936	23963.9	11650	197802
chip I21-1112
	P2	C2-P2_predon	1				20000	0.3	6.7	300	138	859558	6228.68	26	158106	148	299846	2025.99	26	33553	1	48	48	48	48	12751195	11865419	0.930534	186	73	9923014	53349.5	6698	515648
	P2	C2-P2_postdon		1			5000	0.7	3.13	160	67	60084	896.776	28	41307	76	61414	808.079	27	32184	1	40	40	40	40	1793988	1632337	0.909893	105	56	1395671	13292.1	1963	110097
	P2	C2-P2_prethirdP			1		12000	0.5	4	300	51	424473	8323	26	74231	64	203381	3177.83	26	29138	2	137	68.5	49	88	5970959	5624504	0.941977	86	46	5165677	60066	4218	375376
	P2	C2-P2_postthirdP				1	7000	0.8	4.38	160	98	424513	4331.77	26	117775	114	198778	1743.67	26	57544	3	95	31.6667	26	37	6822798	6408839	0.939327	140	85	6221439	44438.8	2563	335299

## Sheet: Table S4
Table S4: Differential expression analysis to define the cell identity of each cluster (filtered for adjusted p-value of <0.0001 and selected top 20 based on absolute logFC)
Cluster 0
gene_id	symbol	adjusted p-value	average log2FC	description
ENSG00000173821	AC124319.1	5.94873e-54	1.92806	ring finger protein 213
ENSG00000173221	GLRX	1.47728e-09	1.55895	glutaredoxin
ENSG00000008517	IL32	4.66199e-66	1.5195	interleukin 32
ENSG00000054654	SYNE2	1.04886e-25	1.47332	spectrin repeat containing nuclear envelope protein 2
ENSG00000090104	RGS1	4.21074e-28	1.40979	regulator of G protein signaling 1
ENSG00000155657	TTN	1.58602e-08	1.31029	titin
ENSG00000172183	ISG20	7.21423e-41	1.30352	interferon stimulated exonuclease gene 20
ENSG00000227507	LTB	4.1079e-38	1.30038	lymphotoxin beta
ENSG00000100097	LGALS1	7.51433e-32	1.27812	galectin 1
ENSG00000019582	CD74	7.07425e-32	1.24707	CD74 molecule
ENSG00000181847	TIGIT	7.14901e-26	1.24383	T cell immunoreceptor with Ig and ITIM domains
ENSG00000119705	SLIRP	2.14449e-52	-1.29363	SRA stem-loop interacting RNA binding protein
ENSG00000175768	TOMM5	4.34195e-59	-1.30311	translocase of outer mitochondrial membrane 5
ENSG00000239672	NME1	3.00917e-61	-1.32034	NME/NM23 nucleoside diphosphate kinase 1
ENSG00000181163	NPM1	3.62742e-82	-1.37891	nucleophosmin 1
ENSG00000048162	NOP16	6.33505e-50	-1.54994	NOP16 nucleolar protein
ENSG00000164687	FABP5	8.92144e-45	-1.66363	fatty acid binding protein 5
ENSG00000115541	HSPE1	8.99911e-82	-1.71012	heat shock protein family E (Hsp10) member 1
ENSG00000109471	IL2	2.82203e-10	-1.82253	interleukin 2
ENSG00000100453	GZMB	3.67835e-07	-1.84606	granzyme B
Cluster 1
gene_id	symbol	adjusted p-value	average log2FC	description
ENSG00000109471	IL2	1.09298e-18	2.10297	interleukin 2
ENSG00000115541	HSPE1	7.28384e-133	1.98952	heat shock protein family E (Hsp10) member 1
ENSG00000164687	FABP5	5.16397e-62	1.79781	fatty acid binding protein 5
ENSG00000048162	NOP16	3.82763e-81	1.76506	NOP16 nucleolar protein
ENSG00000181163	NPM1	9.76833e-130	1.59616	nucleophosmin 1
ENSG00000239672	NME1	1.54119e-101	1.56851	NME/NM23 nucleoside diphosphate kinase 1
ENSG00000119705	SLIRP	2.33754e-90	1.55074	SRA stem-loop interacting RNA binding protein
ENSG00000132341	RAN	5.38967e-89	1.42658	RAN, member RAS oncogene family
ENSG00000175768	TOMM5	3.69882e-78	1.36335	translocase of outer mitochondrial membrane 5
ENSG00000132965	ALOX5AP	1.15269e-31	-1.36828	arachidonate 5-lipoxygenase activating protein
ENSG00000204397	CARD16	1.67628e-20	-1.36878	caspase recruitment domain family member 16
ENSG00000090104	RGS1	1.85698e-26	-1.41396	regulator of G protein signaling 1
ENSG00000173221	GLRX	1.42547e-07	-1.45586	glutaredoxin
ENSG00000019582	CD74	6.98434e-37	-1.47692	CD74 molecule
ENSG00000008517	IL32	9.42387e-63	-1.54795	interleukin 32
ENSG00000100097	LGALS1	1.57404e-40	-1.56332	galectin 1
ENSG00000054654	SYNE2	1.31312e-31	-1.75698	spectrin repeat containing nuclear envelope protein 2
ENSG00000169442	CD52	1.51675e-43	-1.90326	CD52 molecule
ENSG00000173821	AC124319.1	7.58069e-49	-1.94149	ring finger protein 213
ENSG00000271503	CCL5	1.45515e-09	-2.41256	C-C motif chemokine ligand 5
Cluster 2
gene_id	symbol	adjusted p-value	average log2FC	description
ENSG00000115523	GNLY	2.5954e-44	4.86256	granulysin
ENSG00000276070	CCL4L2	3.81569e-14	4.40926	C-C motif chemokine ligand 4 like 2
ENSG00000271503	CCL5	2.01199e-89	4.24882	C-C motif chemokine ligand 5
ENSG00000275302	CCL4	6.891e-18	3.84078	C-C motif chemokine ligand 4
ENSG00000105374	NKG7	2.73522e-76	3.50775	natural killer cell granule protein 7
ENSG00000134539	KLRD1	2.30034e-48	2.67479	killer cell lectin like receptor D1
ENSG00000100453	GZMB	1.66859e-31	2.57305	granzyme B
ENSG00000169442	CD52	2.91305e-23	2.49192	CD52 molecule
ENSG00000277632	CCL3	1.36763e-17	2.23012	C-C motif chemokine ligand 3
ENSG00000153563	CD8A	6.03776e-31	2.01432	CD8a molecule
ENSG00000172116	CD8B	1.41583e-30	1.8555	CD8b molecule
ENSG00000163564	PYHIN1	1.09902e-15	1.71892	pyrin and HIN domain family member 1
ENSG00000109943	CRTAM	1.43604e-25	1.70027	cytotoxic and regulatory T cell molecule
ENSG00000077984	CST7	5.15882e-35	1.51204	cystatin F
ENSG00000153283	CD96	1.33284e-07	1.50601	CD96 molecule
ENSG00000100450	GZMH	5.68932e-49	1.3706	granzyme H
ENSG00000132965	ALOX5AP	1.83207e-07	1.32733	arachidonate 5-lipoxygenase activating protein
ENSG00000239672	NME1	2.53469e-10	-1.37789	NME/NM23 nucleoside diphosphate kinase 1
ENSG00000119705	SLIRP	3.43464e-12	-1.54543	SRA stem-loop interacting RNA binding protein
ENSG00000115541	HSPE1	2.83098e-15	-1.90412	heat shock protein family E (Hsp10) member 1
Cluster 3
gene_id	symbol	adjusted p-value	average log2FC	description
ENSG00000163735	CXCL5	5.51744e-07	4.75584	C-X-C motif chemokine ligand 5
ENSG00000164733	CTSB	3.71054e-07	4.73143	cathepsin B
ENSG00000038427	VCAN	1.49797e-31	4.71627	versican
ENSG00000166920	C15orf48	1.27276e-29	4.67346	chromosome 15 open reading frame 48
ENSG00000118785	SPP1	4.11786e-10	4.40513	secreted phosphoprotein 1
ENSG00000011600	TYROBP	5.97629e-24	4.31113	TYRO protein tyrosine kinase binding protein
ENSG00000163736	PPBP	2.54115e-07	4.21655	pro-platelet basic protein
ENSG00000204472	AIF1	9.02487e-08	3.5922	allograft inflammatory factor 1
ENSG00000109099	PMP22	7.22003e-24	3.47765	peripheral myelin protein 22
ENSG00000170458	CD14	8.78924e-13	3.4762	CD14 molecule
ENSG00000166927	MS4A7	3.95383e-30	3.31938	membrane spanning 4-domains A7
ENSG00000011422	PLAUR	2.3337e-18	3.31769	plasminogen activator, urokinase receptor
ENSG00000101336	HCK	1.20759e-55	3.28403	HCK proto-oncogene, Src family tyrosine kinase
ENSG00000163220	S100A9	1.01454e-09	3.26542	S100 calcium binding protein A9
ENSG00000268173	AC007192.1	8.70782e-14	3.25171	novel protein, readthrough between PIK3R2 and IFI30
ENSG00000100985	MMP9	6.29788e-17	3.18832	matrix metallopeptidase 9
ENSG00000216490	IFI30	7.4077e-12	3.14629	IFI30 lysosomal thiol reductase
ENSG00000155465	SLC7A7	7.75569e-17	3.08254	solute carrier family 7 member 7
ENSG00000182853	VMO1	2.3987e-09	2.97129	vitelline membrane outer layer 1 homolog
ENSG00000090382	LYZ	1.0124e-14	2.92657	lysozyme

## Sheet: Table S5
Table S5: Gene Ontology Enrichment Results (top 5 up and top 5 down) based on differentially expressed genes (p adjusted value <0.01) between clusters
Cluster 0
category	direction	rank	over-represented p-value	term
GO:0051707	up	1	4.97959e-11	response to other organism
GO:0043207	up	2	5.12557e-11	response to external biotic stimulus
GO:0009607	up	3	9.48946e-11	response to biotic stimulus
GO:0044419	up	4	1.64823e-10	biological process involved in interspecies interaction between organisms
GO:0002376	up	5	1.879e-10	immune system process
GO:0006952	up	6	2.28537e-10	defense response
GO:0002683	up	7	7.49234e-10	negative regulation of immune system process
GO:0006955	up	8	1.00679e-09	immune response
GO:0009605	up	9	1.0177e-09	response to external stimulus
GO:0019883	up	10	2.32139e-09	antigen processing and presentation of endogenous antigen
GO:0022613	down	1	2.33506e-63	ribonucleoprotein complex biogenesis
GO:0042254	down	2	4.88904e-55	ribosome biogenesis
GO:0006364	down	3	7.63311e-43	rRNA processing
GO:0016072	down	4	3.63389e-41	rRNA metabolic process
GO:0006412	down	5	1.07942e-39	translation
GO:0043043	down	6	2.89543e-38	peptide biosynthetic process
GO:0006396	down	7	1.09719e-34	RNA processing
GO:0006518	down	8	1.23013e-33	peptide metabolic process
GO:0034470	down	9	5.45107e-33	ncRNA processing
GO:0043604	down	10	4.53235e-32	amide biosynthetic process
Cluster 1
category	direction	rank	over-represented p-value	term
GO:0022613	up	1	3.00759e-62	ribonucleoprotein complex biogenesis
GO:0042254	up	2	3.15428e-55	ribosome biogenesis
GO:0006412	up	3	4.49539e-49	translation
GO:0043043	up	4	5.95584e-48	peptide biosynthetic process
GO:0006396	up	5	6.4548e-45	RNA processing
GO:0006364	up	6	9.19163e-43	rRNA processing
GO:0006518	up	7	9.68174e-42	peptide metabolic process
GO:0016072	up	8	2.83784e-41	rRNA metabolic process
GO:0043604	up	9	3.48496e-41	amide biosynthetic process
GO:0034470	up	10	5.60013e-39	ncRNA processing
GO:0002376	down	1	9.85995e-13	immune system process
GO:0006955	down	2	2.63813e-12	immune response
GO:0019883	down	3	4.26519e-11	antigen processing and presentation of endogenous antigen
GO:0009607	down	4	4.84185e-11	response to biotic stimulus
GO:0044419	down	5	7.95358e-11	biological process involved in interspecies interaction between organisms
GO:0006952	down	6	1.21021e-10	defense response
GO:0051707	down	7	1.73346e-10	response to other organism
GO:0043207	down	8	1.7858e-10	response to external biotic stimulus
GO:0002483	down	9	4.3924e-10	antigen processing and presentation of endogenous peptide antigen
GO:0032101	down	10	7.8636e-10	regulation of response to external stimulus
Cluster 2
category	direction	rank	over-represented p-value	term
GO:0001906	up	1	< 2.2E-308	cell killing
GO:0001909	up	2	< 2.2E-308	leukocyte mediated cytotoxicity
GO:0002228	up	3	< 2.2E-308	natural killer cell mediated immunity
GO:0002252	up	4	< 2.2E-308	immune effector process
GO:0002376	up	5	< 2.2E-308	immune system process
GO:0002443	up	6	< 2.2E-308	leukocyte mediated immunity
GO:0002449	up	7	< 2.2E-308	lymphocyte mediated immunity
GO:0006950	up	8	< 2.2E-308	response to stress
GO:0006952	up	9	< 2.2E-308	defense response
GO:0006955	up	10	< 2.2E-308	immune response
GO:0022613	down	1	5.3352e-08	ribonucleoprotein complex biogenesis
GO:0006412	down	2	1.20436e-07	translation
GO:0043043	down	3	1.59222e-07	peptide biosynthetic process
GO:0043604	down	4	6.36925e-07	amide biosynthetic process
GO:0006518	down	5	7.56049e-07	peptide metabolic process
GO:0002181	down	6	1.12728e-06	cytoplasmic translation
GO:0042254	down	7	1.59064e-06	ribosome biogenesis
GO:0043603	down	8	5.79795e-06	cellular amide metabolic process
GO:0051099	down	9	5.81508e-06	positive regulation of binding
GO:0034645	down	10	7.00741e-06	cellular macromolecule biosynthetic process

## Sheet: Table S6
Table S6: Genes with differential expression (adjusted p-value < 0.01) between third-party-stimulated alloreactive T cells within clusters from before to 3-5 years after transplant
Cluster 0
gene_id	symbol	average log2FC	adjusted p-value	direction
ENSG00000008517	IL32	-1.37996	7.94204e-06	down
ENSG00000100097	LGALS1	-1.15244	2.44346e-05	down
ENSG00000019582	CD74	-1.11328	0.00994719	down
ENSG00000142227	EMP3	-1.0992	0.000258251	down
ENSG00000168209	DDIT4	-1.01806	6.85568e-06	down
ENSG00000167815	PRDX2	-0.914199	0.000864593	down
ENSG00000221983	UBA52	0.786908	0.000872591	up
Cluster 1
gene_id	symbol	average log2FC	adjusted p-value	direction
ENSG00000008517	IL32	-1.95823	5.89245e-07	down
ENSG00000186891	TNFRSF18	-1.8636	0.00907288	down
ENSG00000172183	ISG20	-1.72515	0.000481109	down
ENSG00000019582	CD74	-1.6872	0.0010054	down
ENSG00000132965	ALOX5AP	-1.51183	0.00393152	down
ENSG00000074800	ENO1	-1.07111	0.00161176	down
ENSG00000166710	B2M	-0.722877	0.000193648	down
ENSG00000224877	NDUFAF8	0.543837	0.00018696	up
ENSG00000101132	PFDN4	0.585933	0.00618777	up
ENSG00000239789	MRPS17	0.702679	0.000685778	up
ENSG00000158747	NBL1	0.798557	0.0011417	up
ENSG00000112081	SRSF3	0.799022	0.00328039	up
ENSG00000173436	MICOS10	0.819335	0.00551375	up
ENSG00000156411	ATP5MJ	0.898471	0.00716077	up
ENSG00000171530	TBCA	0.912642	0.00590345	up
ENSG00000100138	SNU13	0.941202	0.00498609	up
ENSG00000181163	NPM1	0.957509	0.00269766	up
ENSG00000145741	BTF3	0.967075	0.000178737	up
ENSG00000108561	C1QBP	1.01026	0.000718324	up
ENSG00000186395	KRT10	1.02132	0.0015956	up
ENSG00000182004	SNRPE	1.04347	0.00646137	up
ENSG00000115541	HSPE1	1.20901	0.00181658	up
ENSG00000125870	SNRPB2	1.2192	0.00055519	up
ENSG00000164346	NSA2	1.24753	0.00220906	up
ENSG00000100664	EIF5	1.25904	0.00165896	up
ENSG00000168275	COA6	1.26328	0.00301509	up
ENSG00000171202	TMEM126A	1.36383	6.48241e-05	up
ENSG00000221983	UBA52	1.51397	1.05576e-06	up
ENSG00000100142	POLR2F	1.66672	0.000211213	up
ENSG00000119705	SLIRP	1.69042	1.68914e-05	up
ENSG00000172115	CYCS	1.88224	4.61412e-07	up
ENSG00000164687	FABP5	2.56474	8.9254e-07	up

## Sheet: Table S7
Table S7: Gene Ontology Enrichment Results (top 10 up and top 10 down) based on differentially expressed genes (adjusted p-value <0.1) between third-party samples from a pre and post timepoint per cluster
Cluster 0
category	direction	over-represented p-value	term
GO:0042110	down	3.28168e-05	T cell activation
GO:0046598	down	3.7351e-05	positive regulation of viral entry into host cell
GO:0075294	down	3.7351e-05	positive regulation by symbiont of entry into host
GO:1903902	down	0.000112921	positive regulation of viral life cycle
GO:0050863	down	0.000137982	regulation of T cell activation
GO:0007155	down	0.000156791	cell adhesion
GO:0046649	down	0.000192687	lymphocyte activation
GO:0098609	down	0.000199081	cell-cell adhesion
GO:0016052	down	0.00025298	carbohydrate catabolic process
GO:1903131	down	0.000269672	mononuclear cell differentiation
GO:0061944	up	0.000683934	negative regulation of protein K48-linked ubiquitination
GO:0021796	up	0.00176572	cerebral cortex regionalization
GO:0061945	up	0.00191775	regulation of protein K48-linked ubiquitination
GO:0021978	up	0.0025454	telencephalon regionalization
GO:0042118	up	0.00277474	endothelial cell activation
GO:1902915	up	0.00383203	negative regulation of protein polyubiquitination
GO:0060352	up	0.00422008	cell adhesion molecule production
GO:1990403	up	0.00503232	embryonic brain development
GO:0021871	up	0.00510824	forebrain regionalization
GO:0018149	up	0.00526062	peptide cross-linking
Cluster 1
category	direction	over-represented p-value	term
GO:0019886	down	2.98039e-06	antigen processing and presentation of exogenous peptide antigen via MHC class II
GO:0002495	down	4.16853e-06	antigen processing and presentation of peptide antigen via MHC class II
GO:0002504	down	5.18677e-06	antigen processing and presentation of peptide or polysaccharide antigen via MHC class II
GO:0002478	down	6.4283e-06	antigen processing and presentation of exogenous peptide antigen
GO:0019884	down	1.21409e-05	antigen processing and presentation of exogenous antigen
GO:0045785	down	1.84226e-05	positive regulation of cell adhesion
GO:0002376	down	2.41905e-05	immune system process
GO:0048002	down	2.5123e-05	antigen processing and presentation of peptide antigen
GO:0051249	down	3.54484e-05	regulation of lymphocyte activation
GO:0033077	down	3.77296e-05	T cell differentiation in thymus
GO:0022613	up	2.02569e-05	ribonucleoprotein complex biogenesis
GO:0000377	up	4.30544e-05	RNA splicing, via transesterification reactions with bulged adenosine as nucleophile
GO:0000398	up	4.30544e-05	mRNA splicing, via spliceosome
GO:0000375	up	4.76947e-05	RNA splicing, via transesterification reactions
GO:0008380	up	0.000352004	RNA splicing
GO:0042773	up	0.000363044	ATP synthesis coupled electron transport
GO:0042775	up	0.000363044	mitochondrial ATP synthesis coupled electron transport
GO:0006397	up	0.00066514	mRNA processing
GO:0006396	up	0.000743176	RNA processing
GO:0022904	up	0.000839938	respiratory electron transport chain

## Sheet: Table S8
Table S8: Number of cells with a TRA or TRB clonotype shared between pre and post timepoint samples of the same patient (P0, P1, P2) per cluster
			cluster 0		cluster 1		cluster 2		Total
Locus	Patient	Clonotype	pre	post	pre	post	pre	post	pre	post
TRA	P0	TRAV1-1*01//TRAJ5*01	2	1	1	0	0	0	3	1
TRA	P0	TRAV12-3*01//TRAJ52*01	2	0	1	1	0	0	3	1
TRA	P0	TRAV13-1*01//TRAJ31*01	2	1	1	1	0	0	3	2
TRA	P0	TRAV20*01//TRAJ20*01	2	1	0	0	0	0	2	1
TRA	P0	TRAV21*01//TRAJ33*01	1	2	0	2	0	0	1	4
TRA	P0	TRAV21*01//TRAJ58*01	1	1	0	0	0	0	1	1
TRA	P0	TRAV21*02//TRAJ28*01	1	0	1	0	0	1	2	1
TRA	P0	TRAV26-1*01//TRAJ39*01	1	0	0	2	0	1	1	3
TRA	P0	TRAV26-2*01//TRAJ52*01	1	3	1	2	0	2	2	7
TRA	P0	TRAV27*01//TRAJ12*01	3	2	2	1	0	0	5	3
TRA	P0	TRAV27*01//TRAJ37*02	2	6	0	2	0	1	2	9
TRA	P0	TRAV38-1*01//TRAJ43*01	4	2	1	0	0	0	5	2
TRA	P0	TRAV38-2/DV8*01//TRAJ32*01,TRAJ32*02	1	1	1	1	0	1	2	3
TRA	P0	TRAV38-2/DV8*01//TRAJ43*01	1	1	0	0	0	0	1	1
TRA	P0	TRAV38-2/DV8*01//TRAJ57*01	1	1	0	0	0	1	1	2
TRA	P0	TRAV4*01//TRAJ5*01	10	0	2	5	1	1	13	6
TRA	P0	TRAV41*01//TRAJ42*01	1	1	0	0	0	0	1	1
TRA	P0	TRAV9-2*01//TRAJ12*01	1	1	0	0	0	0	1	1
TRB	P0	TRBV12-3*01//TRBJ1-2*01	13	2	8	4	0	0	21	6
TRB	P0	TRBV12-3*01/TRBD1*01/TRBJ2-4*01	0	0	1	1	0	0	1	1
TRB	P0	TRBV12-3*01/TRBD2*01/TRBJ2-5*01	1	2	0	0	0	1	1	3
TRB	P0	TRBV12-3*01/TRBD2*01/TRBJ2-7*01	3	2	2	3	0	0	5	5
TRB	P0	TRBV12-4*01//TRBJ2-7*01	1	1	0	0	0	0	1	1
TRB	P0	TRBV20-1*01//TRBJ2-2*01	1	0	0	0	1	1	2	1
TRB	P0	TRBV20-1*05//TRBJ2-1*01	2	0	0	1	0	0	2	1
TRB	P0	TRBV20-1*05/TRBD1*01/TRBJ1-2*01	2	1	0	0	0	1	2	2
TRB	P0	TRBV3-1*01//TRBJ2-5*01	1	1	0	0	0	0	1	1
TRB	P0	TRBV5-1*01//TRBJ2-1*01	1	1	0	0	0	0	1	1
TRB	P0	TRBV5-1*01/TRBD1*01/TRBJ1-1*01	0	2	1	1	0	0	1	3
TRB	P0	TRBV5-1*01/TRBD1*01/TRBJ1-2*01	1	0	0	1	1	0	2	1
TRB	P0	TRBV5-1*01/TRBD1*01/TRBJ2-3*01	2	2	0	0	0	0	2	2
TRB	P0	TRBV5-1*01/TRBD1*01/TRBJ2-5*01	1	1	0	1	0	0	1	2
TRB	P0	TRBV5-6*01//TRBJ2-5*01	1	1	1	2	0	1	2	4
TRB	P0	TRBV6-6*02/TRBD1*01/TRBJ2-4*01	1	1	0	0	0	0	1	1
TRB	P0	TRBV7-2*01//TRBJ1-2*01	1	1	0	0	0	0	1	1
TRB	P0	TRBV7-2*01/TRBD1*01/TRBJ1-1*01	0	0	3	3	0	0	3	3
TRB	P0	TRBV7-2*01/TRBD2*02/TRBJ2-7*01	1	3	0	0	0	0	1	3
TRB	P0	TRBV9*01//TRBJ1-1*01	1	1	0	0	0	0	1	1
TRA	P1	TRAV13-1*01//TRAJ44*01	0	1	1	0	0	0	1	1
TRA	P1	TRAV13-1*01//TRAJ52*01	1	0	1	1	0	0	2	1
TRA	P1	TRAV17*01//TRAJ9*01	2	1	1	0	0	0	3	1
TRA	P1	TRAV26-1*01//TRAJ50*01	0	0	1	1	0	0	1	1
TRA	P1	TRAV26-1*02//TRAJ29*01	0	0	1	1	0	0	1	1
TRA	P1	TRAV29/DV5*01//TRAJ53*01	0	0	1	1	0	0	1	1
TRA	P1	TRAV5*01//TRAJ6*01	1	1	0	0	0	0	1	1
TRA	P1	TRAV6*01//TRAJ33*01	1	0	0	1	0	0	1	1
TRA	P1	TRAV9-2*01//TRAJ28*01	1	1	0	0	0	0	1	1
TRA	P1	TRAV9-2*01//TRAJ54*01	0	0	1	1	0	0	1	1
TRB	P1	TRBV18*01//TRBJ2-7*01	1	0	0	1	0	0	1	1
TRB	P1	TRBV18*01/TRBD1*01/TRBJ2-7*01	0	0	1	0	0	1	1	1
TRB	P1	TRBV19*01//TRBJ2-2*01	1	0	0	1	0	0	1	1
TRB	P1	TRBV20-1*01//TRBJ1-2*01	1	1	0	0	0	0	1	1
TRB	P1	TRBV20-1*01/TRBD1*01/TRBJ1-5*01	1	0	0	1	0	0	1	1
TRB	P1	TRBV20-1*01/TRBD2*02/TRBJ2-1*01	0	1	1	0	0	0	1	1
TRB	P1	TRBV25-1*01/TRBD1*01/TRBJ2-7*01	0	1	1	0	0	1	1	2
TRB	P1	TRBV28*01//TRBJ1-2*01	1	0	0	1	0	0	1	1
TRB	P1	TRBV29-1*01//TRBJ1-1*01	0	0	1	1	0	0	1	1
TRB	P1	TRBV4-2*01//TRBJ2-3*01	0	1	1	1	0	0	1	2
TRB	P1	TRBV6-5*01//TRBJ2-2*01	0	0	1	1	0	0	1	1
TRB	P1	TRBV7-2*01/TRBD1*01/TRBJ1-3*01	1	1	0	1	0	0	1	2
TRB	P1	TRBV7-9*01/TRBD1*01/TRBJ2-6*01	1	1	0	0	0	0	1	1
TRA	P2	TRAV13-1*01//TRAJ13*01	1	2	0	0	0	0	1	2
TRA	P2	TRAV14/DV4*02//TRAJ6*01	2	2	0	4	0	0	2	6
TRA	P2	TRAV16*01//TRAJ54*01	8	1	1	0	1	2	10	3
TRA	P2	TRAV20*02//TRAJ42*01	0	0	0	5	1	0	1	5
TRA	P2	TRAV21*01//TRAJ34*01	7	0	1	0	1	0	9	0
TRA	P2	TRAV21*01//TRAJ57*01	4	1	1	1	1	0	6	2
TRA	P2	TRAV22*01//TRAJ48*01	3	2	0	0	0	0	3	2
TRA	P2	TRAV23/DV6*01//TRAJ6*01	1	0	0	1	0	0	1	1
TRA	P2	TRAV24*01//TRAJ16*01	0	0	1	1	0	0	1	1
TRA	P2	TRAV29/DV5*01//TRAJ31*01	1	0	0	0	0	1	1	1
TRA	P2	TRAV29/DV5*01//TRAJ43*01	1	0	0	2	0	0	1	2
TRA	P2	TRAV39*01//TRAJ30*01	1	1	1	0	0	0	2	1
TRA	P2	TRAV5*01//TRAJ31*01	1	0	0	1	0	0	1	1
TRA	P2	TRAV6*01//TRAJ28*01	1	0	0	1	0	0	1	1
TRA	P2	TRAV8-3*01//TRAJ20*01	2	0	0	0	0	0	2	0
TRB	P2	TRBV10-3*02/TRBD1*01/TRBJ1-4*01	1	1	0	0	0	0	1	1
TRB	P2	TRBV10-3*02/TRBD1*01/TRBJ2-1*01	0	0	1	0	2	1	3	1
TRB	P2	TRBV12-3*01//TRBJ1-2*01	10	7	5	25	1	2	16	34
TRB	P2	TRBV29-1*01//TRBJ2-6*01	4	1	1	1	0	0	5	2
TRB	P2	TRBV29-1*01/TRBD1*01/TRBJ2-3*01	1	0	0	2	0	0	1	2
TRB	P2	TRBV30*01/TRBD1*01,TRBD2*01,TRBD2*02/TRBJ1-1*01	2	1	0	0	0	1	2	2
TRB	P2	TRBV5-1*01/TRBD1*01/TRBJ2-7*01	1	0	1	2	0	0	2	2
TRB	P2	TRBV5-5*01/TRBD2*02/TRBJ2-2*01	2	2	0	2	0	0	2	4
